# Supplementary material
Source: Copernicus journal article supplement (doi:10.5194/bg-23-3023-2026)
Supplement: Supplementary file [file bg-23-3023-2026-supplement-title-page.pdf › bg-23-3023-2026-supplement-title-page.pdf]

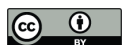

*Supplement of*

**Vertebrate impact on bacterial community structure of coastal Arctic spring snowpacks**

**Sławomir Sułowicz et al.**

*Correspondence to:* Sławomir Sułowicz ([slawomir.sulowicz@us.edu.pl](mailto:slawomir.sulowicz@us.edu.pl))

- [bg-23-3023-2026-supplement-title-page.pdf](#)
- [DADA2\\_Rscript\\_for\\_SI.txt](#)
- [Supplementary Materials.pdf](#)
- [Supplementary excel 1 NGS data.xlsx](#)
- [Supplementary excel 2 CCA data.xlsx](#)

The copyright of individual parts of the supplement might differ from the article licence.
